# Supplementary material
Source: Springer Nature journal article supplement (https://www.springermedizin.de/resource/supplementary/12891_2013_1847_MOESM7_ESM.pdf/9508584)

**A**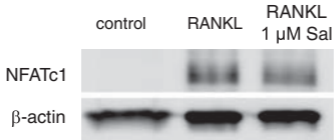**B**

| RANKL      | - | + | + | + | +  | +          |
|------------|---|---|---|---|----|------------|
| salubrinal | - | - | 1 | 5 | 10 | 20 $\mu$ M |

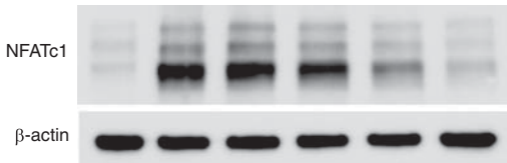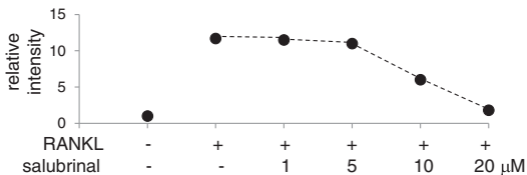**C**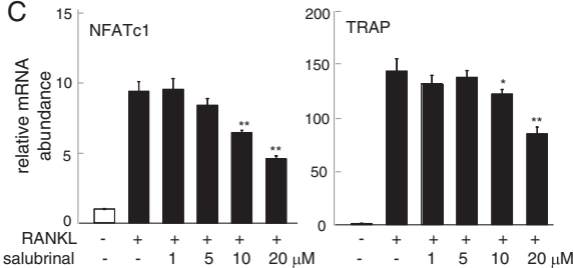

Supplement: MOESM7 [file 9508584]
